# Supplementary material
Source: Springer Nature journal article supplement (https://www.springerprofessional.de/resource/supplementary/13638_2013_856_MOESM2_ESM.pdf/11899094)

$\sigma^2 = 2$ 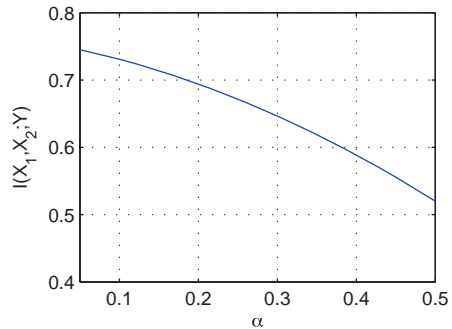 $\sigma^2 = 1$ 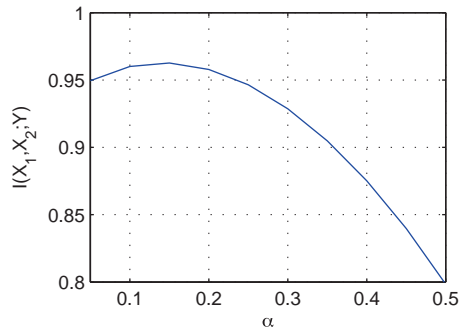 $\sigma^2 = 0.5$ 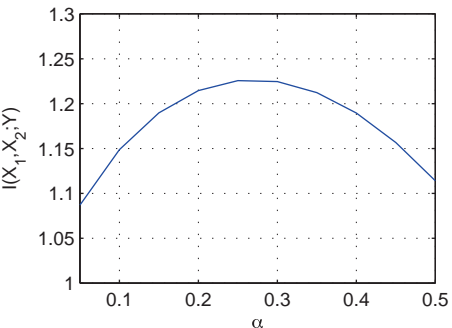 $\sigma^2 = 0.25$ 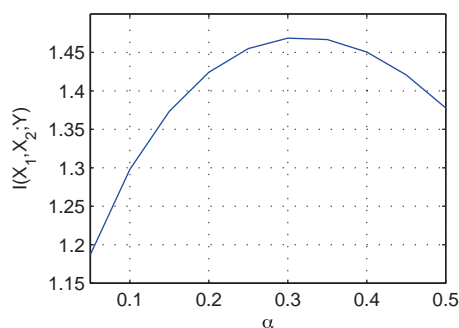

Supplement: MOESM2 [file 11899094]
